# Supplementary material for: A single-site iron catalyst with preoccupied active centers that achieves selective ammonia electrosynthesis from nitrate
Source: Royal Society of Chemistry journal article supplement (doi:10.1039/d1ee00545f), 2021-01-01
Supplement: d1ee00545f1.pdf [file d1ee00545f1.pdf]

## Electronic Supplementary Information

### A single-site iron catalyst with preoccupied active center that achieves selective ammonia electrosynthesis from nitrate

Panpan Li,<sup>a</sup> Zhaoyu Jin,<sup>b\*</sup> Zhiwei Fang,<sup>a</sup> and Guihua Yu<sup>a\*</sup>

#### Experimental details and calculations

##### *SI-SECM measurements*

Surface interrogation scanning electrochemical microscope (SI-SECM) analysis was conducted on a CHI920C SECM bipotentiostat (CH Instrument, the USA). As shown in Fig. 3a, a typical SI-SECM setup includes two identical aligned ultramicroelectrodes (UMEs) named tip UME (at the top) and substrate UME (at the bottom), which is placed in a faraday cage on a vibration isolation table. UMEs were prepared by tightly sealing a platinum wire (50  $\mu\text{m}$  in diameter) in a glass tube with an RG (radius of metal electrode/radius of the glass sheath) value of 1.5-2.0. The substrate UME was fixed at the bottom of the electrolytic cell, while the tip UME can be freely moved to X, Y, Z direction via a positioner.<sup>1</sup> To load catalysts, a cavity (diameter: 50  $\mu\text{m}$ ; depth: 2-3  $\mu\text{m}$ ) was created by electrochemically etching the substrate UME in  $\text{CaCl}_2$  aqueous solutions according to the previous report.<sup>2</sup> Fe-PPy SACs and Fe NPs powders were then pressed in the cavity to closely contact with Pt for better electric conduction. The alignment of tip and substrate UMEs can be determined by the positive feedback approaching curve in the solution containing 0.5 mM ferrocenemethanol (FcMeOH) and 0.1 M KOH. Specifically, the tip was hold at the potential of FcMeOH oxidation (1.4 V vs. RHE) and approached to the substrate that was also applied the potential to reduce  $\text{FcMeOH}^+$  (1.0 V vs. RHE) with the assistance of an optical microscope. The tip current ( $i_{\text{tip}}$ ) was recorded with the traveling distance ( $d$ ) and a positive feedback could be observed because of the cycling of the redox species ( $\text{FcMeOH}/\text{FcMeOH}^+$ ) between the electrodes. After adjusting X and Y directions to obtain the highest feedback  $i_{\text{tip}}$ , we further moved the tip along Z direction by using a piezo block positioner with a rate of 0.2  $\mu\text{m s}^{-1}$ . The plots of  $i_{\text{tip}}$  vs.  $d$  normalized by the tip current at infinity ( $i_{\text{inf}}$ ) and the radius of the tip ( $a$ ) were fitted with a theoretical positive feedback curve to obtain the exact inter-electrode distance.<sup>1, 3</sup> In all SI-SECM experiments, the inter-electrode distance was controlled at ca. 2  $\mu\text{m}$  with the theoretical fitting curve as indicated in Fig. S14b, where the tip could fully collect the feedback species from the substrate. For determining Fe contents on catalysts, the substrate UME was first applied the given potentials (1.2 to -0.2 V vs. RHE) for 20 s to produce active Fe sites ( $\text{Fe(II)}$  or  $\text{Fe(0)}$ ). Subsequently, the chronoamperogram of the tip at 1.4 V vs. RHE was recorded, during which tip-generated  $\text{FcMeOH}^+$  would rapidly react with  $\text{Fe(II)}$  (or  $\text{Fe(0)}$ ) on the substrate UME. A positive feedback was expected to be seen on the tip current until all  $\text{Fe(II)}$  or  $\text{Fe(0)}$  species on the substrate were totally consumed. The number of charges ( $Q_{\text{tip}}$ ) was calculated by the integration of  $i_{\text{tip}}$ -

t curves at different substrate potentials with the background subtraction of negative feedback ( $Q_{tip}$  at  $E_{sub} = 1.2$  V).

#### ***Determination of $NO_2^-$ using the Griess test***

After chronoamperometry tests,  $NO_2^-$  in electrolyte was determined by Griess test.<sup>4</sup> The Griess agent was prepared by dissolving N-(1-naphthyl)ethyldiamine dihydrochloride (0.8 g), sulfonamide (0.04 g) and  $H_3PO_4$  (2 mL, 85%) into 10 ml of DI water. Before the analysis, the nitrite-containing electrolyte (0.1 M KOH) was diluted to the neutral state using HCl (0.1 M). Then, diluted solutions (2 mL) were mixed with the Griess agent (40  $\mu$ L) and rested for 10 min at room temperature. UV-Vis spectrophotometer was employed to record absorption spectrum (400-650 nm) and the absorbance at ca. 540 nm was used to determine the concentration of generated  $NO_2^-$ . The calibration curve was obtained by using various  $NaNO_2$  aqueous solutions as the standard samples (Fig. S6d) in the same operation.

#### ***Determination of $NH_3$ using the indophenol blue method***

The produced  $NH_3$  was determined by the indophenol blue method.<sup>5</sup> Specifically, the target solution (1 mL) was moved into a clean vessel (5 mL) followed by sequentially adding NaOH solution (1 mL, 1 M) containing salicylic acid (5 wt%) and sodium citrate (5 wt%), NaClO (0.5 mL, 0.05 M), and  $Na[Fe(NO)(CN)_5]$  (0.1 mL, 1wt%) aqueous solution. After the incubation for 2 h at room temperature, the mixture was subjected to UV-Vis measurements and resulted in the absorption spectrum (ranged from 500-800 nm). The absorption peak at 655 nm was ascribed to the generated indophenol blue originated from  $NH_3$  in the target solution. To accurately quantify  $NH_3$ , concentration-absorbance curves were calibrated using a series of standard ammonia chloride in KOH solutions (0.1 M) (Fig. S6a). The absorbance of the blank sample without adding the standard  $NH_3$  solution was subtracted from the measured peak absorbance of all tested samples for background correction.

#### ***Determination of $NH_3$ using the $^1H$ NMR spectroscopy***

The amount of produced  $NH_3$  was also quantified by the  $^1H$  NMR spectroscopy. After chronoamperometry tests in Ar-saturated 0.1 M KOH containing 0.1 M  $KNO_3$  at -0.6 V vs. RHE for 0.5 h, the electrolyte (50  $\mu$ L, 5 mL electrolytes in total) in the cathodic chamber was neutralized by  $H_2SO_4$  aqueous solution (50  $\mu$ L, 0.05 M). After that, the neutralized electrolyte (30  $\mu$ L) was mixed with maleic acid (as the internal standard) aqueous solution (10  $\mu$ L, 3.6 mM),  $H_2SO_4$  aqueous solution (10  $\mu$ L, 4 M), and  $d^6$ -DMSO (550  $\mu$ L). After adding tetramethylsilane as the reference, the mixture was sealed into an NMR tube (5 mm in diameter, 600 MHz) for further tests. All  $^1H$  NMR tests were conducted with water suppression using the presaturation experiment. The concentration of produced  $NH_3$  can be determined by comparing the integral area (I) of the vinylic singlets for maleic acid (6.25 ppm, 2H) and the typical triplet for ammonium (7.18 ppm, 4H,  $J = 52$  Hz) based on the followed equation.

$$C_{NH_4^+} = \frac{I_{NH_4^+}/H_{NH_4^+}}{I_s/H_s} \times C_s \quad (1)$$

, where  $C_{NH_4^+}$  and  $C_s$  are the concentration of ammonium and maleic acid (60  $\mu$ mol  $L^{-1}$ ) in NMR tubes;  $H_{NH_4^+}$  and  $H_s$  are the number of protons for ammonium and maleic acid;  $I_{NH_4^+}$  and  $I_s$  are

the integrals of  $^1\text{H}$  NMR peaks for ammonium and maleic acid. Considering the dilution, the calculated  $C_{\text{NH}_4^+}$  needs to multiply by 40 to give the real concentration of produced  $\text{NH}_3$ . The isotopic labeling experiment was conducted to confirm the origin of ammonium using  $\text{Ar}$ -saturated 0.1 M KOH containing  $\text{K}^{15}\text{NO}_3$  as the electrolyte in the same operation described above.

The produced  $\text{NH}_4^+$  (in  $\mu\text{mol}$ , Fig. S10b) was determined to be:

$$M_{\text{NH}_4^+} = C_{\text{NH}_4^+} \times 40 \times 5 \text{ mL} \quad (2)$$

### **Determination of $\text{H}_2$ using SECM**

The amount of hydrogen determined with the SECM was carried out under the same conditions with the bulk electrolysis as described above. Briefly, a Pt UME as the  $\text{H}_2$  probe was placed above the carbon fiber paper electrode loaded with catalysts. A typical substrate-generation tip-collection mode was employed and the distance between the Pt UME and the catalysts was controlled at 15  $\mu\text{m}$  for all of the measurements. Modeling based on finite element analysis was carried out for calibrations of the distance and the concentration profile of  $\text{H}_2$  generated by substrate catalysts as shown in Fig. S8.<sup>6</sup>

### **Calculation of the yield rate and the faradaic efficiency of $\text{NH}_3$**

The yield rate (Y.R.,  $\text{mg}_{\text{NH}_3} \text{ h}^{-1} \text{ cm}^{-2}$ ) of  $\text{NH}_3$  can be calculated using the following equation:

$$\text{Y.R.}(\text{NH}_3) = (C_{\text{NH}_3} \times V) / (t \times A) \times 10^{-3} \quad (3)$$

The faradaic efficiency (F.E.) of  $\text{NH}_3$  was the percentage of the charge consumed for  $\text{NH}_3$  generation in the total charge passed through the electrode according to the equation below:

$$\text{F.E.}(\text{NH}_3) = (8 \times F \times C_{\text{NH}_3} \times V \times 10^{-6}) / (17 \times Q) \times 100\% \quad (4)$$

where  $C_{\text{NH}_3}$  is the measured  $\text{NH}_3$  concentration ( $\mu\text{g mL}^{-1}$ );  $V$  is the volume of the electrolyte (30 mL);  $t$  is the electrolysis time (0.5 h);  $A$  is the geometric area of the electrode ( $0.25 \text{ cm}^2$ );  $F$  is the faraday constant ( $96485 \text{ C mol}^{-1}$ );  $Q$  (C) is the total charge passed through the electrode, which is the integral of  $I$ - $t$  curve. The yield rate, the faradaic efficiency, and corresponding error bars were obtained from three individual samples under the same testing conditions.

### **The faradaic efficiency of $\text{NO}_2^-$ , $\text{H}_2$ , and other products**

The faradaic efficiency of  $\text{NO}_2^-$  was the percentage of the charge for producing  $\text{NO}_2^-$  in the total charge ( $Q$ ) recorded by  $I$ - $t$  curve according to the equation below:

$$\text{F.E.}(\text{NO}_2^-) = (2 \times F \times C_{\text{NO}_2^-} \times V \times 10^{-6}) / (46 \times Q) \times 100\% \quad (5)$$

, where  $C_{\text{NO}_2^-}$  is the measured  $\text{NO}_2^-$  concentration ( $\mu\text{g mL}^{-1}$ ).

The faradaic efficiency of  $\text{H}_2$ ,  $\text{F.E.}(\text{H}_2)$ , can be simply calculated according to the probe and electrolytic currents before and after the addition of  $\text{NO}_3^-$ , assuming 100%  $\text{F.E.}(\text{H}_2)$  in the solution with nitrate free.

$$\text{F.E.}(\text{H}_2) = (i_{\text{probe, w/ Nit.}} / i_{\text{probe, w/o Nit.}}) \times (i_{\text{cat., w/o Nit.}} / i_{\text{cat., w/ Nit.}}) \times 100\% \quad (6)$$

, where  $i_{\text{probe, w/ Nit.}}$  and  $i_{\text{probe, w/o Nit.}}$  are the probe currents with and without adding  $\text{NO}_3^-$ ;  $i_{\text{cat., w/o Nit.}}$  and  $i_{\text{cat., w/ Nit.}}$  present the catalytic currents on substrate catalysts with and without  $\text{NO}_3^-$ .

The faradaic efficiency of other products (e.g.  $\text{N}_2$ ,  $\text{N}_2\text{H}_4$ ,  $\text{NO}_2$  etc.) was the remaining

percentage apart from F.E.(NH<sub>3</sub>), F.E.(NO<sub>2</sub><sup>-</sup>), and F.E.(H<sub>2</sub>) based on the equation:

$$F.E.(\text{others}) = 100\% - F.E.(\text{NH}_3) - F.E.(\text{NO}_2^-) - F.E.(\text{H}_2) \quad (7)$$

### ***The energy consumption for producing NH<sub>3</sub>***

For electrocatalytic ammonia synthesis (NitRR and N<sub>2</sub>RR), the energy consumption (E.C., kWh kg<sub>NH<sub>3</sub></sub><sup>-1</sup>) was obtained assuming the overpotential of the water oxidation at anode is zero.

$$E.C.(\text{NH}_3) = n \times F \times (1.23 - E) / (3600 \times 17) \quad (8)$$

, where n is the electron number for producing ammonia (8 for NitRR and 3 for N<sub>2</sub>RR); E is the applied potential (vs. RHE) for NH<sub>3</sub> production.

For photocatalytic ammonia synthesis, E.C. (kWh kg<sub>NH<sub>3</sub></sub><sup>-1</sup>) was determined according to the equation:

$$E.C.(\text{NH}_3) = P_r \times A_r / (Y.R. \times m) \quad (9)$$

, where P<sub>r</sub> is the radiation power (W cm<sup>-2</sup>); A<sub>r</sub> is the radiation area (cm<sup>2</sup>); Y.R. is the yield rate (kg<sub>NH<sub>3</sub></sub> h<sup>-1</sup> g<sup>-1</sup>); m is the total mass of catalysts (g).

### ***The half-cell energy efficiency for producing NH<sub>3</sub>***

Assuming the overpotential of anodic electrode (the water oxidation) is zero, the half-cell energy efficiency (E.E.) defined as the ratio of chemical energy to applied electrical power was calculated with the following equation:

$$E.E.(\text{NH}_3) = (1.23 - E_{\text{NH}_3}^0) \times F.E.(\text{NH}_3) / (1.23 - E) \times 100\% \quad (10)$$

, where E<sub>NH<sub>3</sub></sub><sup>0</sup> is the equilibrium potential (0.70 V) of nitrate electroreduction to ammonia in alkaline media; F.E.(NH<sub>3</sub>) is the faradaic efficiency for NH<sub>3</sub>; 1.23 V is the equilibrium potential of water oxidation (i.e. assuming the overpotential of the water oxidation is zero); E is the applied potential (vs. RHE) for NH<sub>3</sub> production.

For photocatalytic ammonia synthesis, the energy efficiency is equivalent to the quantum efficiency.

### ***The calculation of electrochemical active surface area***

The electrochemical active surface area (A<sub>EASA</sub>) of catalysts loaded on the UME (A<sub>EASA,UME</sub>, μm<sup>2</sup>) and carbon fiber paper (A<sub>EASA,CFP</sub>, μm<sup>2</sup> cm<sub>geo</sub><sup>-2</sup>) was based on the ideal specific capacitance of carbon electrode (C<sub>EDLC,carbon</sub> = 10 μF cm<sup>-2</sup>) and metal electrode (C<sub>EDLC,metal</sub> = 30 μF cm<sup>-2</sup>) according to the following equation:

$$A_{\text{EASA}} = C_{\text{EDLC}} / C_{\text{EDLC,carbon}} \text{ (or } C_{\text{EDLC,metal}}) \quad (11)$$

, where C<sub>EDLC</sub> is the electric double-layer capacitance of catalysts and is determined by CVs at various scan rates (Fig. S15).

### ***The calculation of EASA-based site density***

The EASA-based site density (atom μm<sub>EASA</sub><sup>-2</sup>) was calculated according to titrated site numbers and A<sub>EASA,UME</sub> of catalysts loaded on the UME shown as below.

$$D_{\text{site density}} = \frac{(C_x - C_{1.2}) \times 10^6}{n \times A_{\text{EASA,UME}} \times F} \times N_A \quad (12)$$

, where  $C_x$  and  $C_{1.2}$  are the integrated charge (nC) from titration curves at a specific substrate potential ( $x$ ) and 1.2 V (as the background);  $n$  is the number of electrons for oxidizing Fe species (3 for Fe(0), 1 for Fe(II));  $A_{EASA}$  is electrochemical active surface area of catalysts on the UME determined by equation (11);  $F$  is faradic constant ( $96485 \text{ C mol}^{-1}$ );  $N_A$  is the Avogadro constant ( $6.02 \times 10^{23}$ ).

### Turnover frequency of ammonia

Turnover frequency (TOF,  $\text{s}^{-1}$ ) of ammonia in NitRR process indicates the number of ammonia molecules produced per unit time and per active sites. Thus, TOF values can be calculated based on the yield rate ( $\text{Y.R.}(\text{NH}_3)$ ,  $\text{mg}_{\text{NH}_3} \text{ h}^{-1} \text{ cm}^{-2}$ ) and EASA-based site density ( $D_{\text{site density}}$ ,  $\text{atom } \mu\text{m}_{EASA}^{-2}$ ) as followed.

$$\text{TOF} = \frac{\text{Y.R.}(\text{NH}_3) \times N_A}{D_{\text{site density}} \times A_{EASA,CFP} \times 17 \times 3600} \quad (13)$$

### Reaction rate constant

A pseudo-first order rate constant can be confirmed by varying delay time ( $t_{\text{delay}}$ ) for generating the titrant ( $\text{FcMeOH}^+$ ) on the tip UME. During  $t_{\text{delay}}$ , the produced Fe active sites (Fe(0) at -0.2 V, Fe(II) at 0.2 V) on the substrate UME could mainly react with  $\text{NO}_3^-$  in 0.1 M KOH electrolytes with adding 0.1 M  $\text{KNO}_3$ , while they could react with  $\text{H}_2\text{O}$  for producing  $\text{H}_2$  without  $\text{KNO}_3$ . After  $t_{\text{delay}}$ ,  $\text{FcMeOH}^+$  was generated to oxidize the remaining Fe active sites. Therefore, Fe species consumed by  $\text{NO}_3^-$  and  $\text{H}_2\text{O}$  related to  $t_{\text{delay}}$  can be plotted to determine the reaction rate constant of  $\text{NO}_3^-$  ( $k_{\text{NO}_3^-}$ ) and  $\text{H}_2\text{O}$  adsorption ( $k_{\text{H}_2\text{O}}$ ).

In 0.1 M KOH containing  $\text{KNO}_3$ , the  $\text{NO}_3^-$  adsorption process is described below.

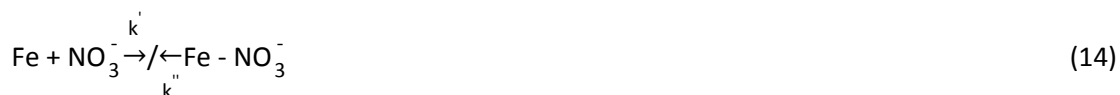

In 0.1 M KOH without  $\text{KNO}_3$ , the adsorption process on Fe sites is expressed as follows.

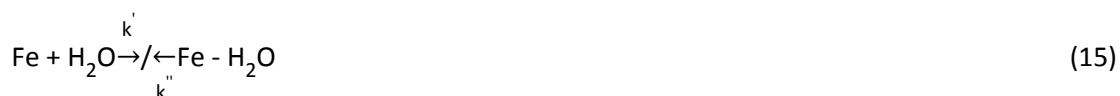

In this system,  $\text{NO}_3^-$  and  $\text{H}_2\text{O}$  contents are almost unchanged and are also much higher than Fe active sites. Thus, these adsorption processes can be considered as a pseudo-first order reaction.

In 0.1 M KOH + 0.1 M  $\text{KNO}_3$ ,  $k_{\text{NO}_3^-}$  can be determined by plotting  $\ln[\text{Fe}]$  as a function of  $t_{\text{delay}}$ .

$$-\frac{d[\text{Fe}]}{dt_{\text{delay}}} = k_{\text{NO}_3^-} \times [\text{Fe}] \quad (16)$$

$$\ln [\text{Fe}]_{t_{\text{delay}}} = -k_{\text{NO}_3^-} \times t_{\text{delay}} + \ln [\text{Fe}]_0 \quad (17)$$

, where  $[\text{Fe}]$  ( $\mu\text{mol cm}_{EASA}^{-2}$ ) is surface concentration of Fe active sites ( $[\text{Fe}] = D_{\text{site density}}/N_A$ ) at

the delay time.

Similarly, in 0.1 M KOH without KNO<sub>3</sub>,  $k_{\text{H}_2\text{O}}'$  can be calculated according to the following equation.

$$-\frac{d[\text{Fe}]}{dt_{\text{delay}}} = k_{\text{H}_2\text{O}}' \times [\text{Fe}] \quad (18)$$

$$\ln [\text{Fe}]_{t_{\text{delay}}} = -k_{\text{H}_2\text{O}}' \times t_{\text{delay}} + \ln [\text{Fe}]_0 \quad (19)$$

Through plotting [Fe] against  $t_{\text{delay}}$ ,  $k_{\text{NO}_3^-}'$  and  $k_{\text{H}_2\text{O}}'$  can be calculated according to the slopes of the linear fitting results as shown on Fig. 3c and d.

### **Density functional theory (DFT) calculations**

All DFT calculations in this study were performed using DMOL<sup>3</sup> code with Perdew-Burke-Ernzerhof (PBE) functional and the plane-wave pseudopotential for the spin-polarized generalized gradient approximation (GGA).<sup>7, 8</sup> The empirical DFT-D method with the Grimme scheme was applied for dispersion corrections, including van der Waals interactions.<sup>9, 10</sup> One Fe-N<sub>4</sub> moiety was anchored onto the center of 6 × 6 graphene monolayer separated by a vacuum layer of 20 Å. The process of geometry optimization approached the convergence criteria for the energy and force on each atom reducing below 1 × 10<sup>-6</sup> eV and 0.01 eV Å<sup>-1</sup>. The real-space global orbital cutoff radius was set to 4.7 Å with a 3 × 3 × 1 *k*-point grid for all calculations.

The conductor-like screening model (COSMO) was employed to introduce the treatment of solvation effects.<sup>11, 12</sup> The free energy ( $\Delta G$ ) calculations of each elementary step were based on the standard hydrogen electrode model, which can be determined as <sup>13</sup>

$$\Delta G = \Delta E + \Delta E_{\text{ZPE}} - T\Delta S - neU \quad (20)$$

where  $\Delta E$  and  $\Delta S$  are the reaction energy and entropy change;  $\Delta E_{\text{ZPE}}$  is the difference in zero-point energy between the adsorbed and the gas phase molecules; *U* is the applied bias and *n* is the electron transfer number involved in the reaction. Here *U* = 0 V for free energies diagrams demonstrated in the paper.

Element steps of nitrate reduction on Fe-based catalysts were simulated according to the following reactions:

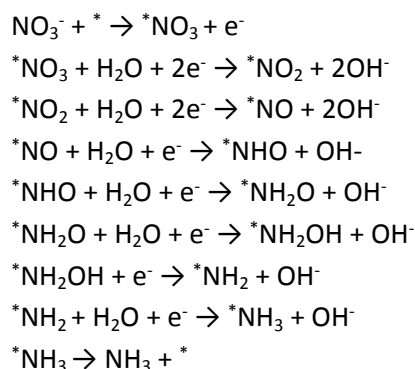

where \* represents the adsorption site. And similarly, the hydrogen evolution reaction was

also simulated as the following steps:

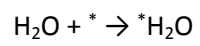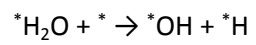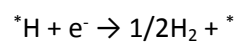

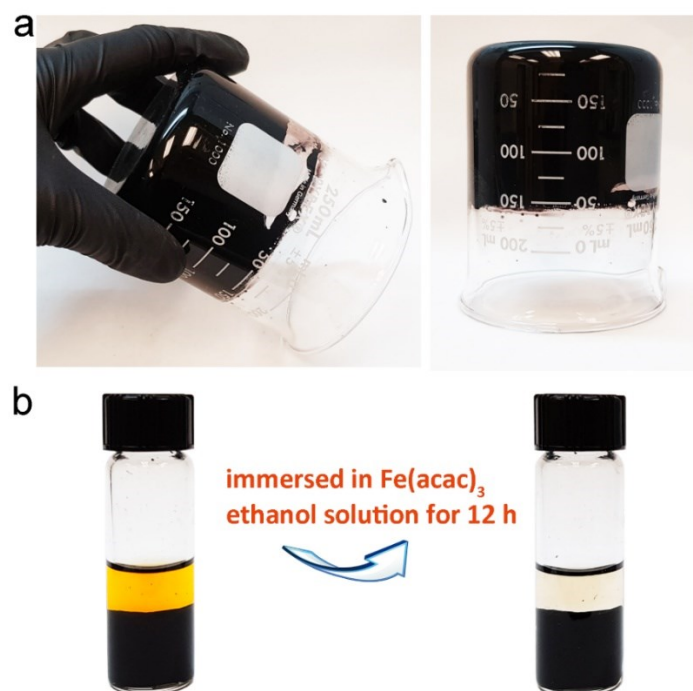

**Fig. S1** Photos of PPy-SDS hydrogels (a) and  $\text{Fe}(\text{acac})_3$ -loaded PPy-SDS hydrogels (b).

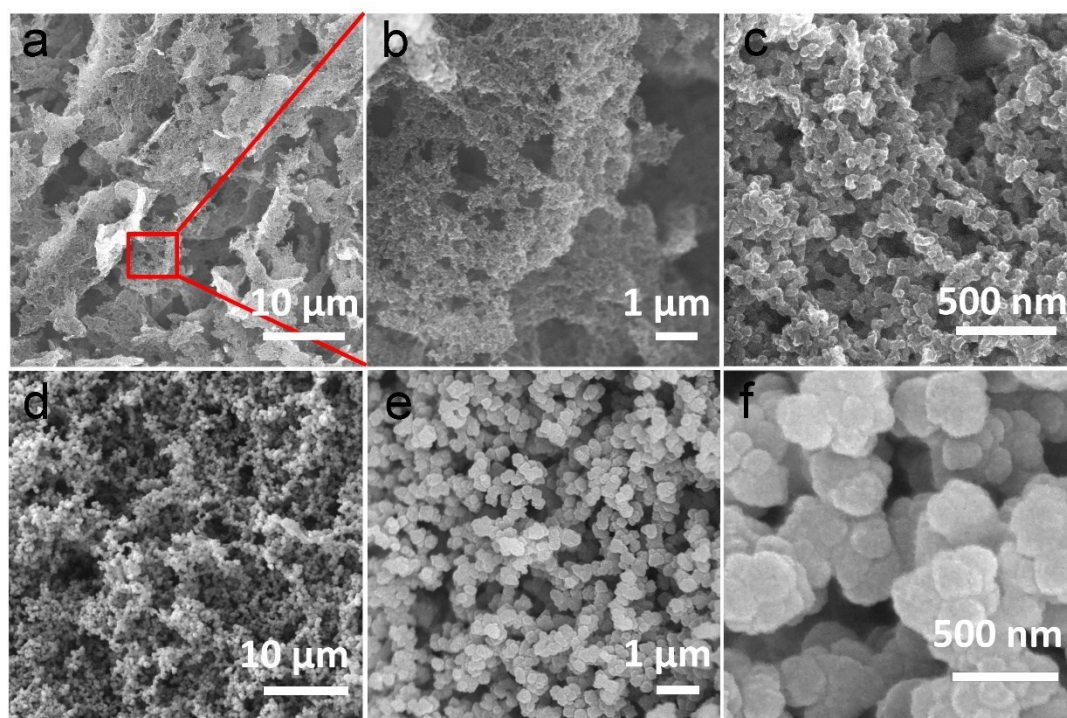

**Fig. S2** SEM images of PPy-SDS hydrogels (a-c) and PPy samples (d-f) without adding SDS.

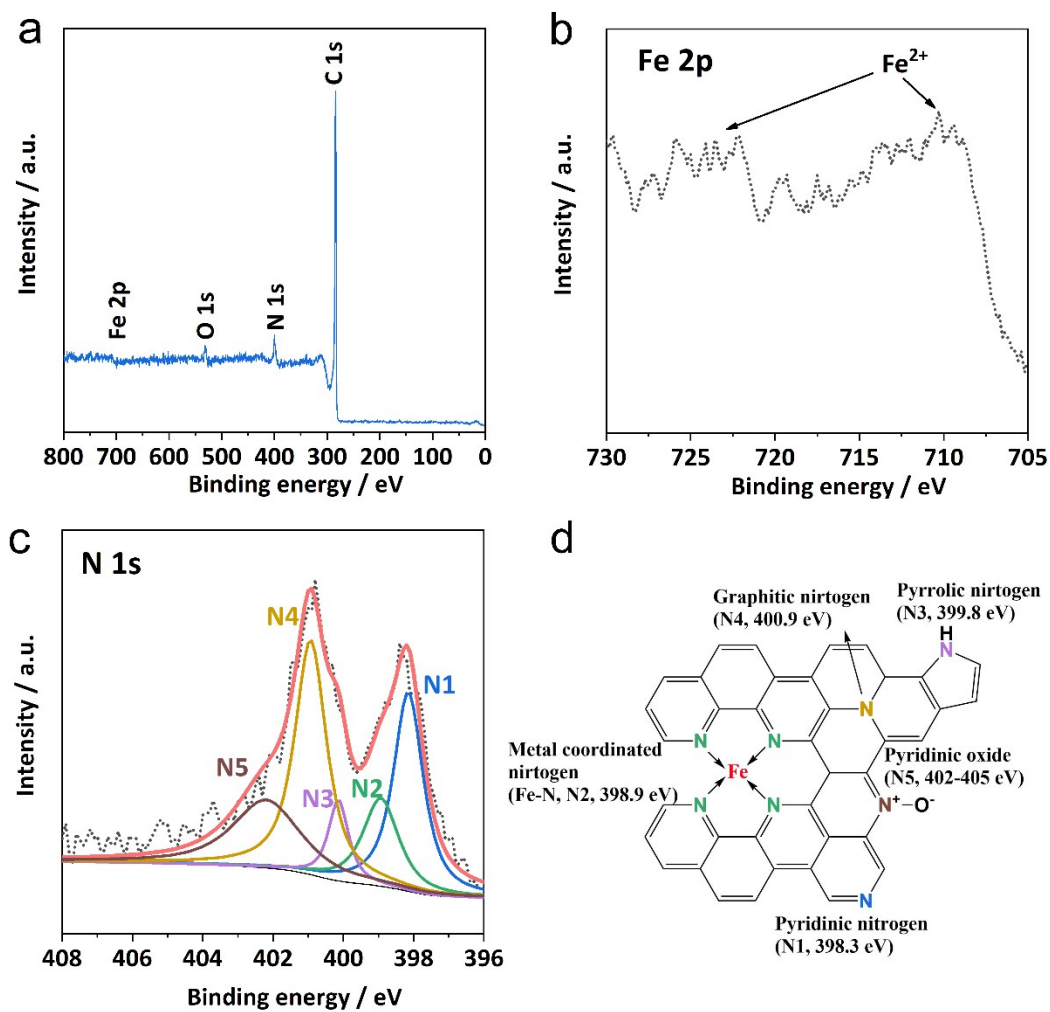

**Fig. S3** XPS analysis of Fe-PPy SACs. (a) XPS survey spectrum; (b) Fe 2p spectrum; (c) N 1s spectrum; (d) chemical structures of nitrogen species on a carbon substrate.

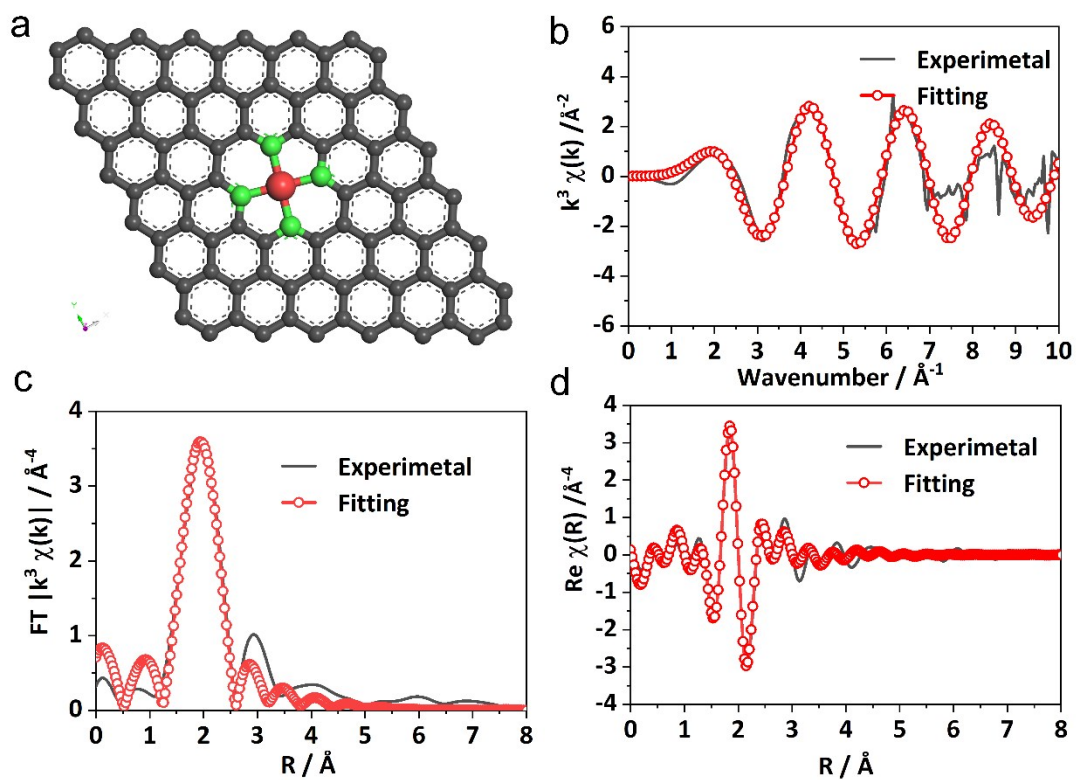

**Fig. S4** (a) The optimized Fe-N4 structure. (b) The fitting curve of Fe K-edge EXAFS spectra of Fe-PPy SACs in  $k$  (b) and  $R$  space (c, d).

**Table S1.** First-shell fitting parameters of Fe K-edge EXAFS for Fe-PPy SACs.

| <b>Bonding mode</b>                           | <b>Fe-N</b>  |
|-----------------------------------------------|--------------|
| <b>CN</b>                                     | 3.76±0.84    |
| <b>R / Å</b>                                  | 1.980±0.076  |
| <b><math>\sigma^2 / \times 10^{-3}</math></b> | 5.93±3.6     |
| <b><math>\Delta E^0 / \text{eV}</math></b>    | -2.319±1.923 |
| <b>k-range</b>                                | 1.85 - 7.1   |
| <b>R-range</b>                                | 0.6 - 2.4    |
| <b>R factor</b>                               | 0.00884      |

CN: coordination number;

R: the distance between absorber and backscatter atoms (or the bond length of Fe-N);

$\sigma^2$ : the Debye-Waller factor value;

$\Delta E^0$ : the inner potential correction to account for the difference in the inner potential between the sample and the reference compound.

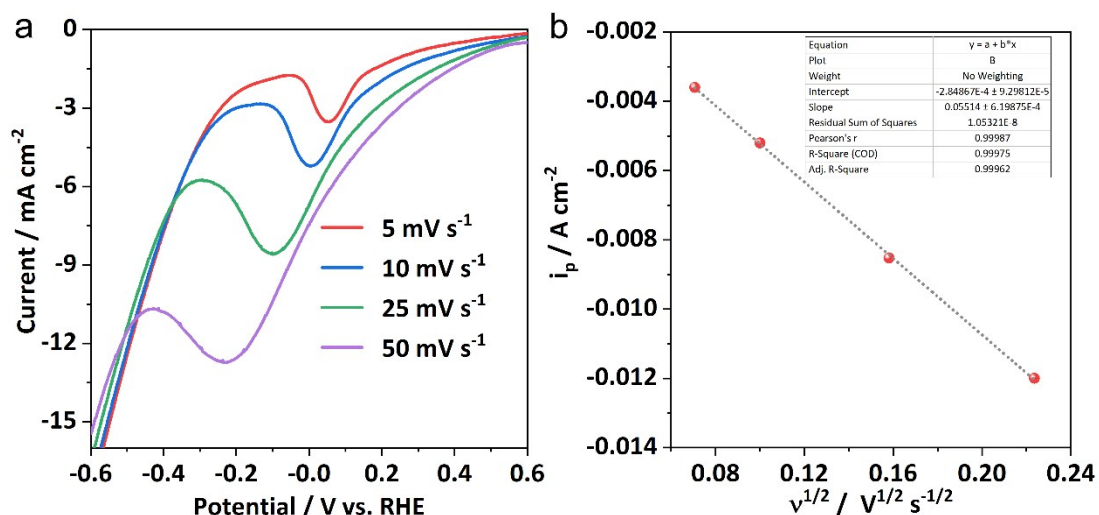

**Fig. S5** (a) LSV curves of Fe-PPy SACs in 0.1 M KOH containing 10 mM KNO<sub>3</sub>. (b) The plot of the square root of scan rate ( $v$ , V s<sup>-1</sup>) vs. reduction peak current density ( $i_p$ , A cm<sup>-2</sup>).

Charge transfer number ( $n$ ) of the reduction peak (from 0 to -0.2 V) is determined by the relationship between the peak current and the scan rate according to the Nicholson-Shain equation under a low NO<sub>3</sub><sup>-</sup> concentration (10 mM, a diffusion-control condition),<sup>14-16</sup>

$$i_p = -2.99 \times 10^5 \times n \times \alpha^{1/2} \times C \times D^{1/2} \times v^{1/2}$$

, where  $\alpha$  (ca. 0.5) is transfer coefficient;  $C$  ( $1 \times 10^{-5}$  mol cm<sup>-3</sup>) is NO<sub>3</sub><sup>-</sup> concentration in bulk electrolytes;  $D$  ( $2 \times 10^{-5}$  cm<sup>2</sup> s<sup>-1</sup>) is the diffusion coefficient.

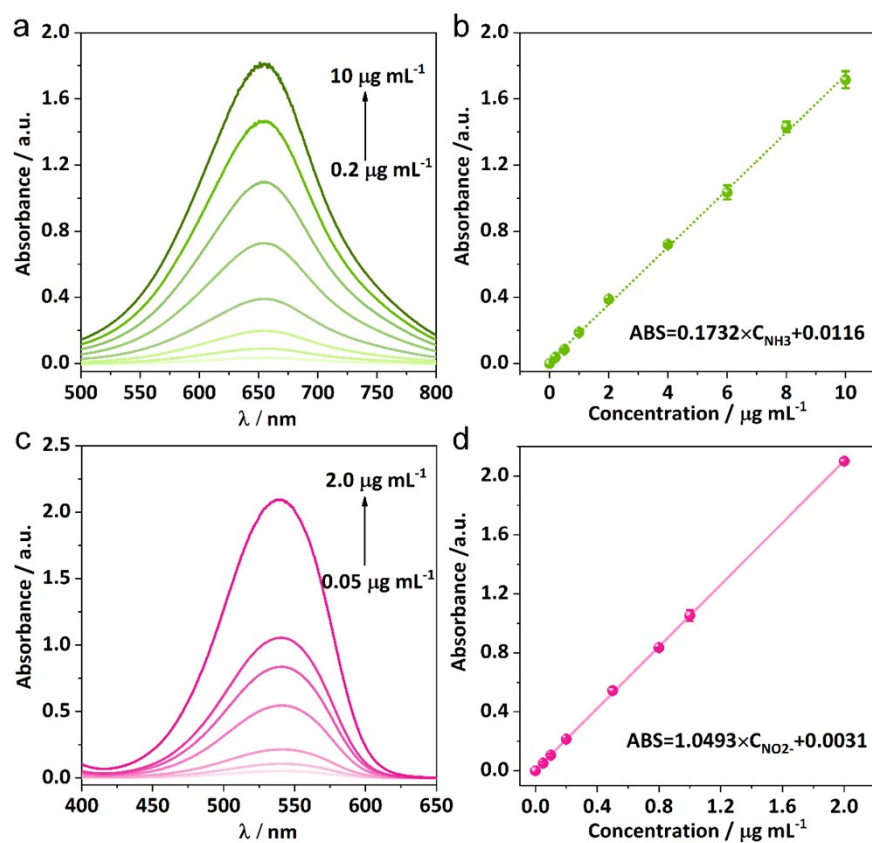

**Fig. S6** UV-Vis curves and calibration curves for determining  $\text{NH}_3$  (a, b) and  $\text{NO}_2^-$  (c, d).

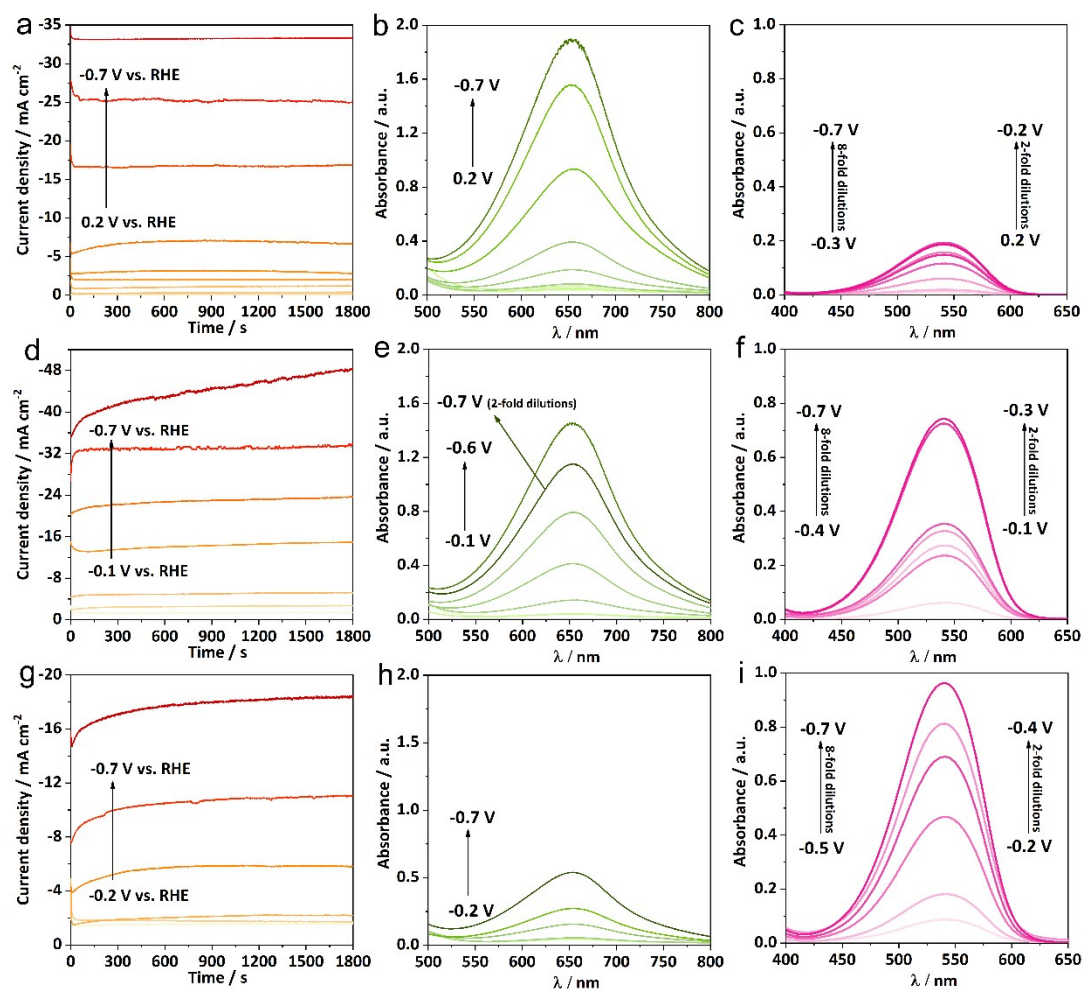

**Fig. S7** I-t curves and UV-Vis curves for quantifying the efficiency of ammonia and nitrite production at various potentials. (a-c) Fe-PPy SACs; (d-f) Fe NPs; (g-i) PPy.

UV-Vis curves for a series of  $\text{NH}_4\text{NO}_3$  standard samples ( $0.2\text{--}10\ \mu\text{g mL}^{-1}$ ) were analyzed in Fig. S6a and the maximum absorption peak at ca. 650 nm was applied to plot the linear calibration curve (Fig. S6b) for the ammonia quantification. I-t curves (Fig. S7a) of Fe-PPy SACs at various given potentials were obtained to calculate the total charge (Q) passing through the electrode. After 30 min of electrolysis, UV-Vis spectra (Fig. S7b) were recorded to determine the concentration of generated ammonia in electrolytes according to the calibration curve.

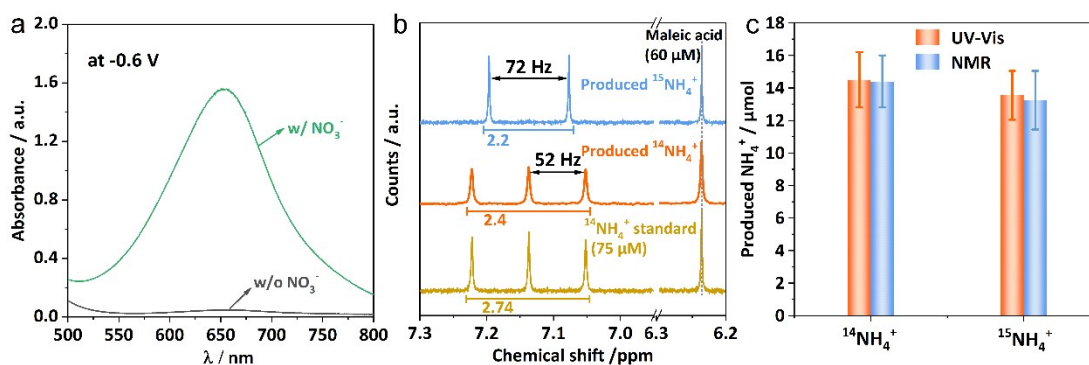

**Fig. S8** (a) UV-Vis spectra of electrolytes with and without NO<sub>3</sub><sup>-</sup> after 0.5 h electrolysis on Fe-PPy SACs. (b) <sup>1</sup>H NMR tests of produced ammonia using K<sup>14</sup>NO<sub>3</sub> and K<sup>15</sup>NO<sub>3</sub> as nitrogen sources. (c) The quantification of ammonia via UV-Vis and NMR measurements.

To eliminate the interference of N from the environment and catalyst, we recorded the UV-Vis spectra of electrolytes in the absence of NO<sub>3</sub><sup>-</sup> after 0.5 h electrolysis with Fe-PPy SACs as shown in Fig. S8a. There is negligible ammonia detected in this test, while electrolytes with NO<sub>3</sub><sup>-</sup> reveals the remarkable absorption intensity, suggesting the NO<sub>3</sub><sup>-</sup>-to-NH<sub>3</sub> production ability on Fe-PPy SACs. We have also conducted <sup>15</sup>N labeling <sup>1</sup>H NMR tests to confirm this result. <sup>14</sup>NO<sub>3</sub><sup>-</sup> was replaced by <sup>15</sup>NO<sub>3</sub><sup>-</sup> as the N source and maleic acid (60 μM, a singlet at ca. 6.24 ppm) was employed as an internal standard for quantifying the generated ammonia (see more details in Supporting Information). From 7.05 to 7.25 ppm (Fig. S8b), <sup>14</sup>NH<sub>4</sub><sup>+</sup> shows a typical triplet with a coupling constant of ca. 52 Hz, while <sup>15</sup>NH<sub>4</sub><sup>+</sup> owns a characteristic doublet with ca. 72 Hz. As a result, the amount of <sup>15</sup>NH<sub>4</sub><sup>+</sup> (ca. 13.25 μmol) is very close to that of <sup>14</sup>NH<sub>4</sub><sup>+</sup> (ca. 14.40 μmol), implying the generated ammonia is mainly from the electrocatalytic NO<sub>3</sub><sup>-</sup>-to-NH<sub>3</sub> reduction. Moreover, the detected ammonia via <sup>1</sup>H NMR is comparable to the results from UV-Vis, suggesting the indophenol blue spectrophotometry is a reliable method for determining ammonia.

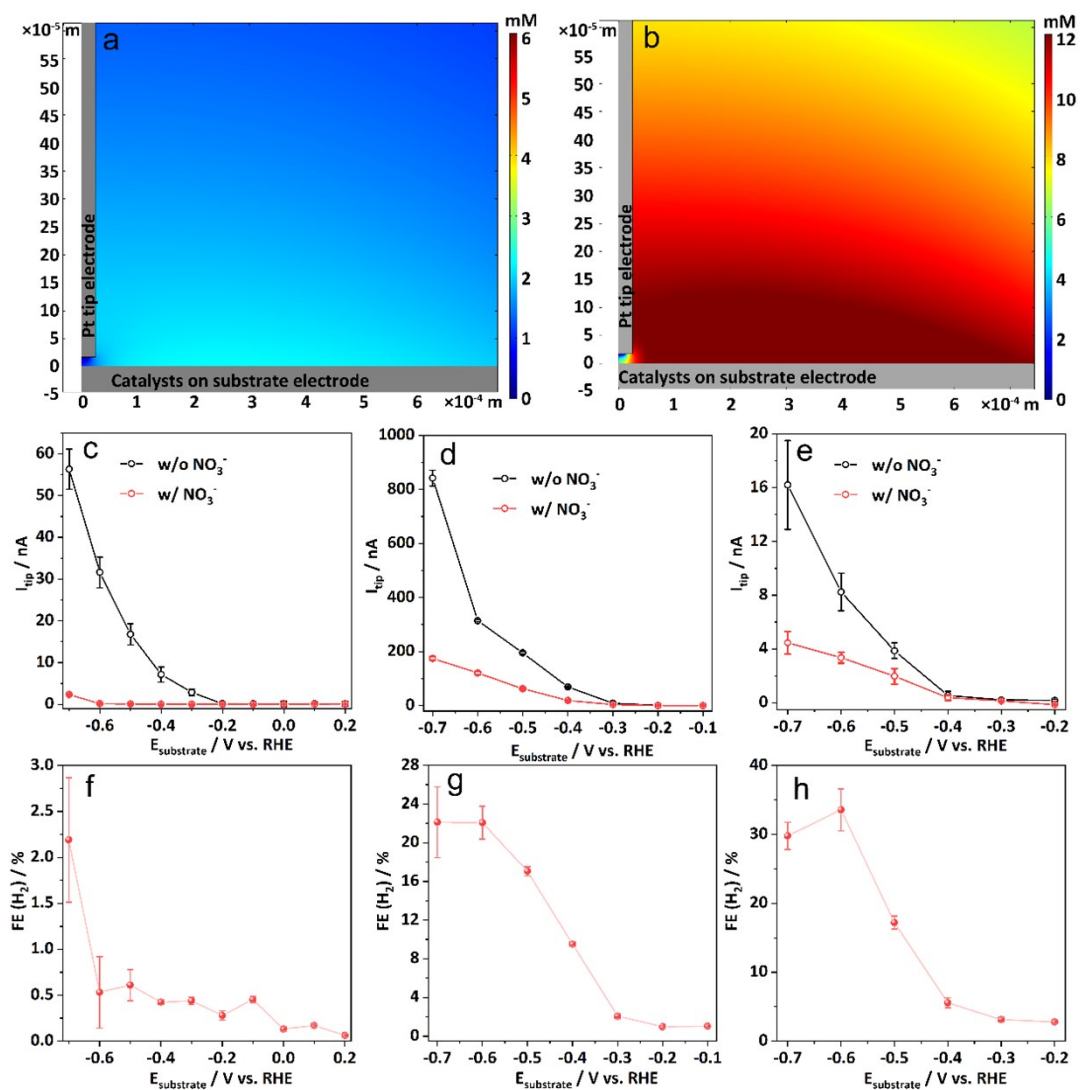

**Fig. S9** The quantification of  $H_2$  during the electrolysis. The  $H_2$  concentration profile with (a) and without (b) adding  $KNO_3$ . The substrate generation-tip collection tests for detecting  $H_2$  on Fe-PPy SACs (c, f), Fe NPs (d, g), and PPy (e, h).

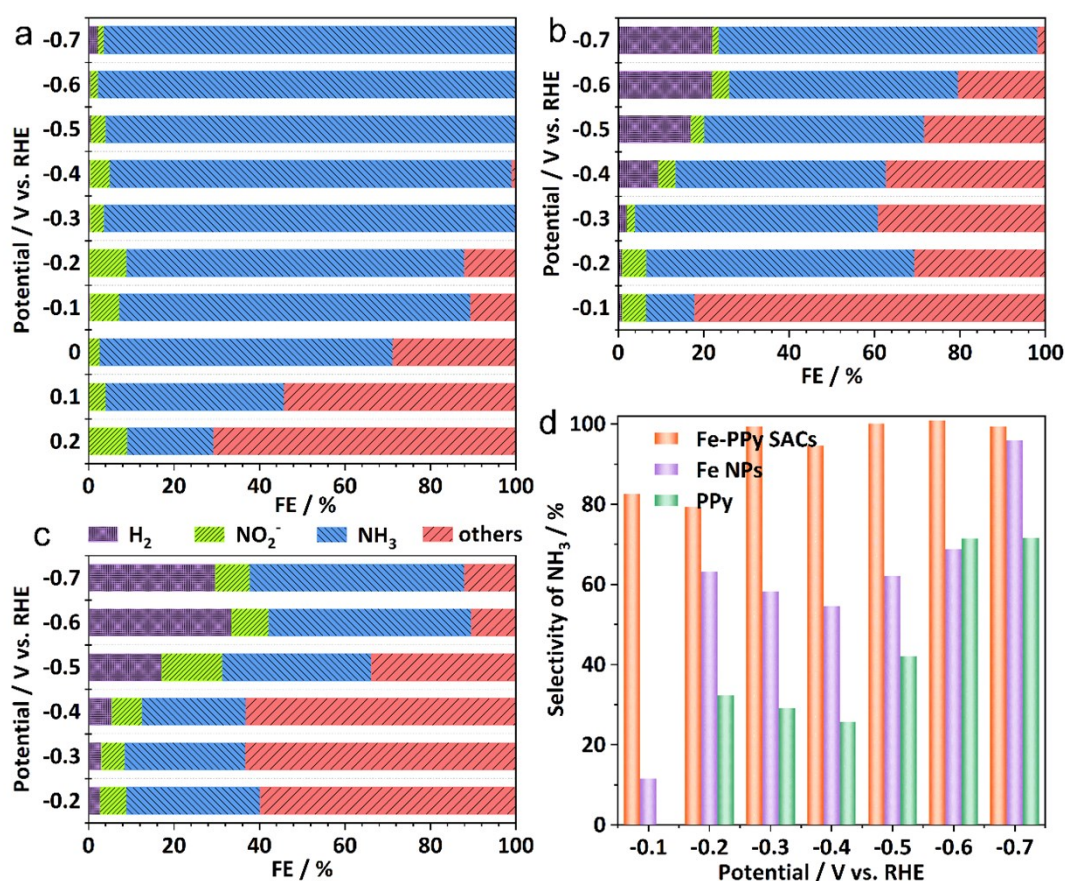

**Fig. S10** The faradaic efficiency of H<sub>2</sub>, NO<sub>2</sub><sup>-</sup>, NH<sub>3</sub>, and other products on (a) Fe-PPy SACs, (b) Fe NPs, and (c) PPy. (d) The selectivity of ammonia of three catalysts.

NO<sub>2</sub><sup>-</sup> quantification is based on the Griess agent as described in the Experimental Section. H<sub>2</sub> is quantified by a typical substrate generation-tip collection experiment using the SECM (Fig. S9). The F.E. of other gas products (e.g. N<sub>2</sub>, N<sub>2</sub>H<sub>4</sub>, NO<sub>2</sub> etc.), which are most likely to be produced at very low yield though, is defined as the remaining percentage apart from F.E.(NH<sub>3</sub>), F.E.(NO<sub>2</sub><sup>-</sup>), and F.E.(H<sub>2</sub>). One impressive finding is that almost no H<sub>2</sub> (F.E. < 2%) was detected in Fe-PPy SACs. In contrast, Fe NPs and PPy appear to experience the noticeable H<sub>2</sub> evolution starting from -0.3 V, reaching a highest F.E.(H<sub>2</sub>) of ca. 22% and ca. 35%, respectively. It should be further noticed that current densities at potential above 0 V are too low (microamp level) that the quantification of other products, F.E.(others), based on the total charge may remain significant deviations. The majority of the deviations, as far as we are concerned, are probably induced by background signals, double-layered charging current, and instrumental offset, which would not contribute to any faraday reactions. Despite of this, we also contained these unavoidable impacts into the estimation of F.E.(others), but the statement about the accuracy especially for the lower overpotentials as discussed needs careful attention. Consequently, the selectivity of ammonia for the NitRR is compared from -0.1 to -0.7 V (vs. RHE) in Fig. S10, where Fe-PPy SACs reveal the impressively selective NH<sub>3</sub> production with above 80% at all potentials.

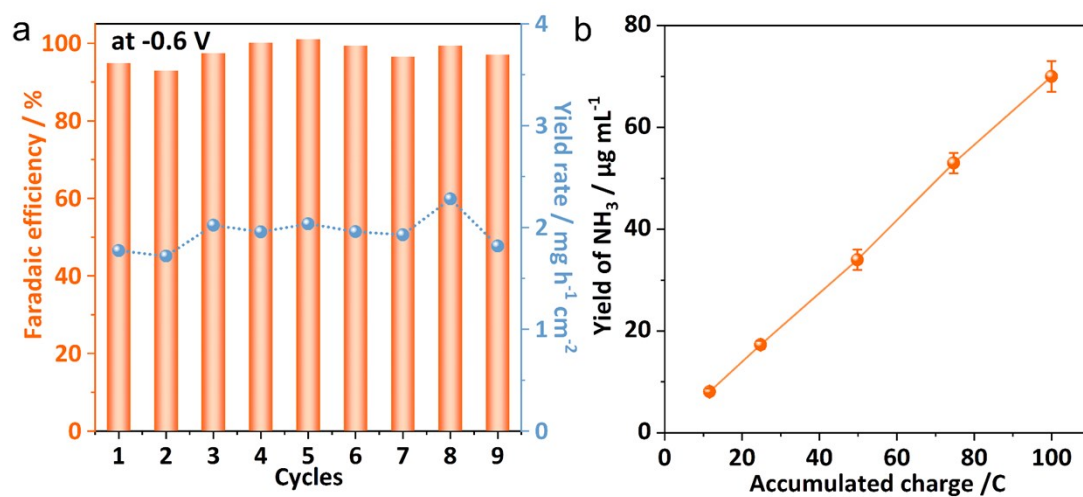

**Fig. S11** (a) The catalytic durability of Fe-PPy SACs. (b) The  $\text{NH}_3$  yield along with the accumulated charge.

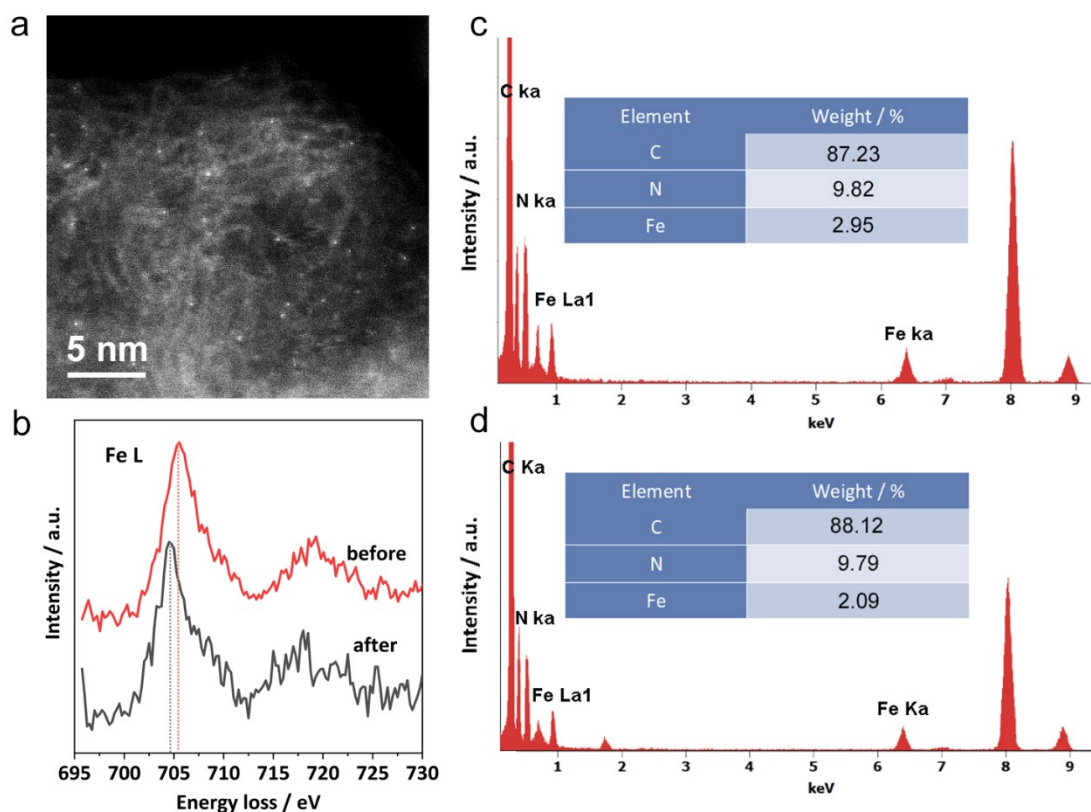

**Fig. S12** (a) The STEM of Fe-PPy SACs after the electrolysis. (b) Fe L EELS spectra of Fe-PPy SACs before and after electrolysis. The EDS elemental analysis of Fe-PPy SACs before (c) and after (d) electrolysis.

Fe L EELS (Fig. S12b) and EDS (Fig. S12c-d) images before and after electrolysis (0.5 h at -0.6 V) were carried out to confirm the stability of Fe-PPy SACs in terms of structure and elemental content. A slight negative shift of energy loss was observed on Fe L EELS after electrolysis, suggesting the partial reduction of Fe species due to the negative potential applied on the Fe-PPy SACs.<sup>17</sup> The EDS elemental analysis indicates Fe, N, and C are almost stable before and after electrolysis.

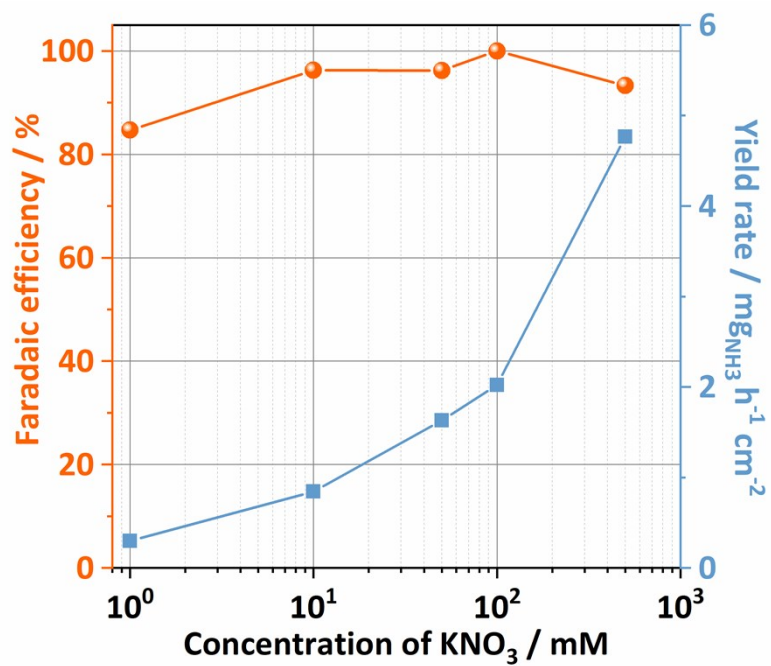

**Fig. S13** The faradaic efficiency and yield rate of ammonia in various KNO<sub>3</sub> electrolytes ranged from 1-500 mM.

**Table S2** The essential parameters of ammonia synthesis of Fe-PPy SACs compared with other catalysts.

| NH <sub>3</sub> synthesis route    | Catalysts                                         | Electrolytes                                                                                                                  | Mass loading /<br>mg cm <sub>geo</sub> <sup>-2</sup> | Yield rate /<br>mmol g <sup>-1</sup> h <sup>-1</sup>                                 | Yield rate / $\mu$ mol<br>cm <sup>-2</sup> h <sup>-1</sup>                              | Selectivity or<br>faradaic<br>efficiency / %                                       | Energy<br>consumption /<br>kWh kg <sub>NH<sub>3</sub></sub> <sup>-1</sup>              | Energy efficiency<br>/ %                                                               | Ref.      |
|------------------------------------|---------------------------------------------------|-------------------------------------------------------------------------------------------------------------------------------|------------------------------------------------------|--------------------------------------------------------------------------------------|-----------------------------------------------------------------------------------------|------------------------------------------------------------------------------------|----------------------------------------------------------------------------------------|----------------------------------------------------------------------------------------|-----------|
| Haber-Bosch                        | Ru                                                | -                                                                                                                             | -                                                    | 60.4                                                                                 | -                                                                                       | 66                                                                                 | 9                                                                                      | 61                                                                                     | 18        |
| Enzymatic N <sub>2</sub> fixation  | ATP-nitrogenase                                   | -                                                                                                                             | -                                                    | 59                                                                                   | -                                                                                       | -                                                                                  | -                                                                                      | -                                                                                      | 19        |
| Photocatalytic N <sub>2</sub> RR   | Modified C <sub>3</sub> N <sub>4</sub>            | N <sub>2</sub> -saturated EG                                                                                                  | 10 mg in 40 mL EG                                    | 3.42                                                                                 | -                                                                                       | -                                                                                  | 12151                                                                                  | -                                                                                      | 20        |
|                                    | Mo-PCN SACs                                       | N <sub>2</sub> -saturated DI water                                                                                            | 3 mg (~0.01 mg Mo) in 6 mL DI water                  | 239                                                                                  | -                                                                                       | -                                                                                  | 1893                                                                                   | 0.6                                                                                    | 21        |
| Electrocatalytic N <sub>2</sub> RR | Ru SACs on N-doped carbon Bi nanocrystals         | N <sub>2</sub> -saturated 0.05 M H <sub>2</sub> SO <sub>4</sub>                                                               | 0.255 (0.18% Ru)                                     | 7.11                                                                                 | 0.0033                                                                                  | 29.6                                                                               | 6.76                                                                                   | 23.60                                                                                  | 22        |
|                                    |                                                   | N <sub>2</sub> -saturated 0.5 M K <sub>2</sub> SO <sub>4</sub>                                                                | 0.258                                                | 200                                                                                  | 51.6                                                                                    | 66                                                                                 | 8.66                                                                                   | 41.11                                                                                  | 23        |
|                                    | MoN@NC                                            | N <sub>2</sub> -saturated 0.1 M HCl                                                                                           | 0.4                                                  | 4.52                                                                                 | 1.81                                                                                    | 6.9                                                                                | 6.76                                                                                   | 5.50                                                                                   | 24        |
|                                    | Zr-TiO <sub>2</sub>                               | N <sub>2</sub> -saturated 0.1 M KOH                                                                                           | 1                                                    | 0.52                                                                                 | 0.52                                                                                    | 17.3                                                                               | 7.95                                                                                   | 11.74                                                                                  | 25        |
|                                    | Bi <sub>4</sub> O <sub>11</sub> /CeO <sub>2</sub> | N <sub>2</sub> -saturated 0.1 M HCl                                                                                           | 2                                                    | 1.37                                                                                 | 2.74                                                                                    | 10.16                                                                              | 6.76                                                                                   | 8.10                                                                                   | 26        |
|                                    | s-TiO <sub>2</sub> NTs                            | N <sub>2</sub> -saturated 0.1 M HCl                                                                                           | 0.33                                                 | 1                                                                                    | 0.33                                                                                    | 26                                                                                 | 8.18                                                                                   | 17.13                                                                                  | 27        |
|                                    |                                                   |                                                                                                                               |                                                      |                                                                                      |                                                                                         |                                                                                    |                                                                                        |                                                                                        |           |
| Electrocatalytic NitRR             | Strained Ru nanoclusters                          | 1 M KOH + 1 M KNO <sub>3</sub>                                                                                                | 0.185                                                | 5560                                                                                 | 1029                                                                                    | ~100                                                                               | 25.60                                                                                  | 26.6                                                                                   | 28        |
|                                    | Cu-Ni alloy                                       | 1 M KOH + 0.1 M KNO <sub>3</sub>                                                                                              | -                                                    | -                                                                                    | 4160                                                                                    | ~100                                                                               | 17.41                                                                                  | 29.71                                                                                  | 29        |
|                                    | Cu/Cu <sub>2</sub> O nanowire arrays              | 0.5 M Na <sub>2</sub> SO <sub>4</sub> + 200 ppm nitrate N (NaNO <sub>3</sub> ) PBS (0.1 M, pH = 7) + 500 ppm KNO <sub>3</sub> | -                                                    | -                                                                                    | 240                                                                                     | 81.2                                                                               | 26.23                                                                                  | 16.01                                                                                  | 30        |
|                                    | O-Cu-PTCDA                                        |                                                                                                                               | 0.197 (Cu)                                           | 130                                                                                  | 25.6                                                                                    | 77                                                                                 | 20.56                                                                                  | 19.37                                                                                  | 31        |
|                                    | Au/C                                              | 0.5 M K <sub>2</sub> SO <sub>4</sub> + 1 mM KNO <sub>3</sub>                                                                  | 0.07                                                 | 22.63                                                                                | 1.58                                                                                    | 26                                                                                 | 19.30                                                                                  | 6.97                                                                                   | 32        |
|                                    | O-TiO <sub>2</sub> NTs                            | 0.5 M Na <sub>2</sub> SO <sub>4</sub> + 50 ppm nitrate N (NaNO <sub>3</sub> )                                                 | 1                                                    | 45                                                                                   | 45                                                                                      | 87.1                                                                               | 27.41                                                                                  | 16.43                                                                                  | 33        |
|                                    |                                                   |                                                                                                                               |                                                      |                                                                                      |                                                                                         |                                                                                    |                                                                                        |                                                                                        |           |
|                                    |                                                   |                                                                                                                               |                                                      |                                                                                      |                                                                                         |                                                                                    |                                                                                        |                                                                                        |           |
|                                    |                                                   |                                                                                                                               |                                                      |                                                                                      |                                                                                         |                                                                                    |                                                                                        |                                                                                        |           |
|                                    | Fe-PPy SACs                                       | 0.1 M KOH + 0.1 M KNO <sub>3</sub>                                                                                            | 0.24 (2.38% Fe)                                      | 2507 (-0.3 V)<br>5930 (-0.4 V)<br>12800 (-0.5 V)<br>20780 (-0.6 V)<br>28400 (-0.7 V) | 14.32(-0.3 V)<br>33.87 (-0.4 V)<br>73.11 (-0.5 V)<br>118.70 (-0.6 V)<br>162.22 (-0.7 V) | 99.69 (-0.3 V)<br>94.15 (-0.4 V)<br>100 (-0.5 V)<br>100 (-0.6 V)<br>98.43 (-0.7 V) | 19.33 (-0.3 V)<br>20.60 (-0.4 V)<br>21.86 (-0.5 V)<br>23.12 (-0.6 V)<br>24.38 (-0.7 V) | 35.12 (-0.3 V)<br>31.13 (-0.4 V)<br>31.46 (-0.5 V)<br>29.57 (-0.6 V)<br>27.50 (-0.7 V) | This work |

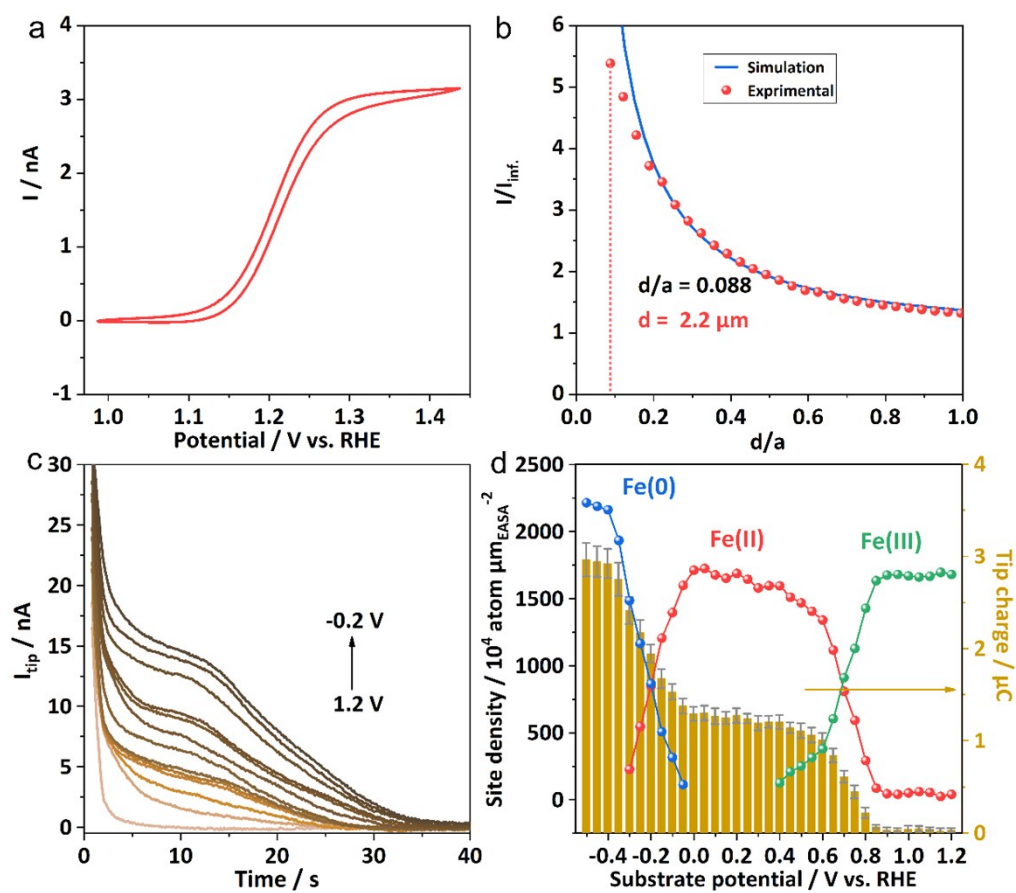

**Fig. S14** (a) CV curve of FcMeOH (0.5 mM) oxidation in 0.1 M KOH on a Pt UME (50  $\mu\text{m}$  in diameter). (b) The tip approaching curve to determine the inter-electrode distance ( $d$ , ca. 2.2  $\mu\text{m}$ ) between the tip and substrate electrodes, where  $a$  is the semidiameter of Pt UME (25  $\mu\text{m}$ ). (c) The titration curves collected on the tip UME at various substrate potentials for Fe NPs. (d) The site densities of Fe(III), Fe(II), and Fe(0) species on Fe NPs calculated from the tip charge.

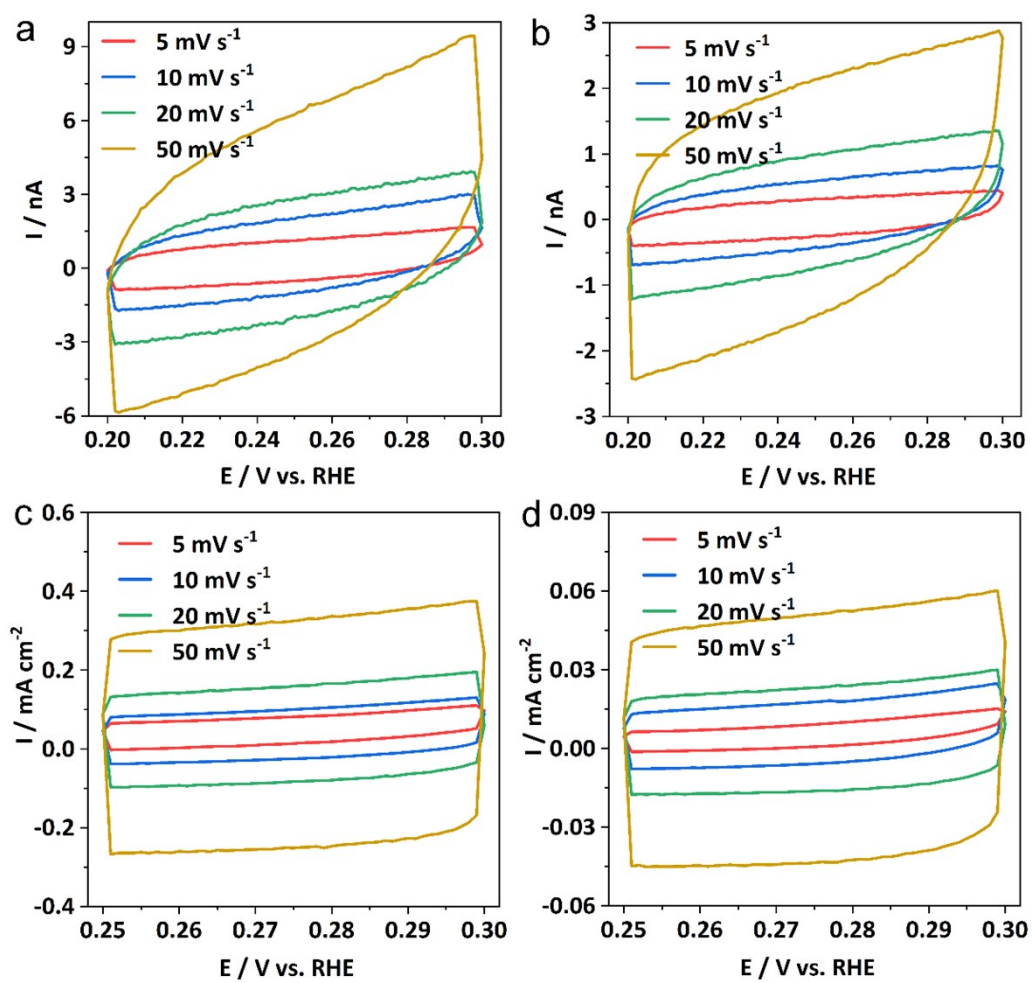

**Fig. S15** CVs at different scan rates for determining EASA. (a, c) Fe NPs; (b, d) Fe-PPy SACs.

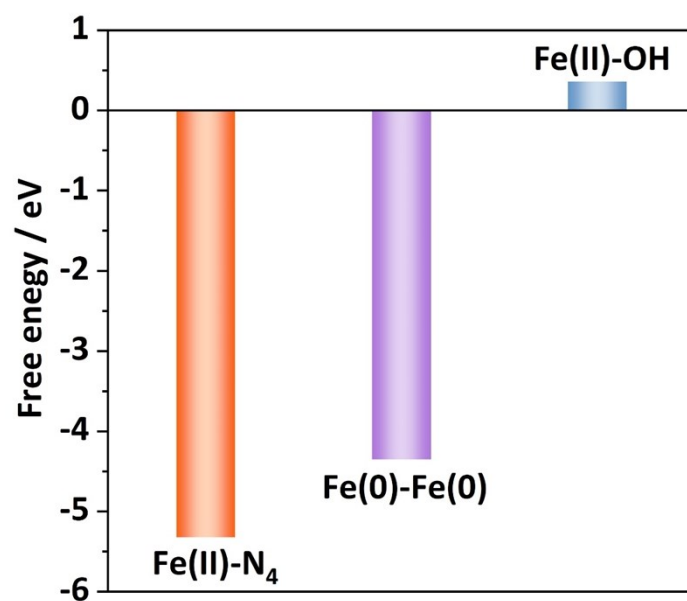

**Fig. S16** The free energy of  $\text{NO}_3^-$  adsorption on Fe-PPy SACs ( $\text{Fe(II)-N}_4$ ), Fe NPs ( $\text{Fe(0)-Fe(0)}$ ), and  $\text{Fe(OH)}_2$  ( $\text{Fe(II)-OH}$ ).

## Reference

1. A. J. Bard and M. V. Mirkin, in *Scanning Electrochemical Microscopy, Second Edition*, CRC Press, Boca Raton, 2012.
2. B. Zhang, Y. Zhang and H. S. White, *Anal. Chem.*, 2004, **76**, 6229-6238.
3. J. Kwak and A. J. Bard, *Anal. Chem.*, 1989, **61**, 1221-1227.
4. L. C. Green, D. A. Wagner, J. Glogowski, P. L. Skipper, J. S. Wishnok and S. R. Tannenbaum, *Anal. Biochem.*, 1982, **126**, 131-138.
5. D. Zhu, L. Zhang, R. E. Ruther and R. J. Hamers, *Nat. Mater.*, 2013, **12**, 836-841.
6. C. M. Sánchez-Sánchez, J. Rodríguez-López and A. J. Bard, *Anal. Chem.*, 2008, **80**, 3254-3260.
7. B. Delley, *J. Chem. Phys.*, 1990, **92**, 508-517.
8. B. Delley, *J. Chem. Phys.*, 2000, **113**, 7756-7764.
9. S. Grimme, J. Antony, S. Ehrlich and H. Krieg, *J. Chem. Phys.*, 2010, **132**, 154104.
10. S. Grimme, *J. Comput. Chem.*, 2004, **25**, 1463-1473.
11. B. Delley, *Mol. Simul.*, 2006, **32**, 117-123.
12. A. Klamt and G. Schüürmann, *J. Chem. Soc., Perkin Trans. 2*, 1993, DOI: 10.1039/P29930000799, 799-805.
13. E. Skúlason, T. Bligaard, S. Gudmundsdóttir, F. Studt, J. Rossmeisl, F. Abild-Pedersen, T. Vegge, H. Jónsson and J. K. Nørskov, *Phys. Chem. Chem. Phys.*, 2012, **14**, 1235-1245.
14. J. B. Allen and R. F. Larry, *Electrochemical methods fundamentals and applications*, John Wiley & Sons, 2001.
15. D. Reyter, D. Bélanger and L. Roué, *Electrochim. Acta*, 2008, **53**, 5977-5984.
16. Y.-J. Shih, Z.-L. Wu, Y.-H. Huang and C.-P. Huang, *Chem. Eng. J.*, 2020, **383**, 123157.
17. M. S. Thompson, T. J. Zega, P. Becerra, J. T. Keane and S. Byrne, *Meteorit. Planet. Sci.*, 2016, **51**, 1082-1095.
18. M. Kitano, Y. Inoue, M. Sasase, K. Kishida, Y. Kobayashi, K. Nishiyama, T. Tada, S. Kawamura, T. Yokoyama, M. Hara and H. Hosono, *Angew. Chem. Int. Ed.*, 2018, **57**, 2648-2652.
19. F. Simpson and R. Burris, *Science*, 1984, **224**, 1095-1097.
20. W. Wang, H. Zhang, S. Zhang, Y. Liu, G. Wang, C. Sun and H. Zhao, *Angew. Chem. Int. Ed.*, 2019, **58**, 16644-16650.
21. X.-W. Guo, S.-M. Chen, H.-J. Wang, Z.-M. Zhang, H. Lin, L. Song and T.-B. Lu, *J. Mater. Chem. A*, 2019, **7**, 19831-19837.
22. Z. Geng, Y. Liu, X. Kong, P. Li, K. Li, Z. Liu, J. Du, M. Shu, R. Si and J. Zeng, *Adv. Mater.*, 2018, **30**, 1803498.
23. Y.-C. Hao, Y. Guo, L.-W. Chen, M. Shu, X.-Y. Wang, T.-A. Bu, W.-Y. Gao, N. Zhang, X. Su, X. Feng, J.-W. Zhou, B. Wang, C.-W. Hu, A.-X. Yin, R. Si, Y.-W. Zhang and C.-H. Yan, *Nat. Catal.*, 2019, **2**, 448-456.
24. X. Yang, F. Ling, J. Su, X. Zi, H. Zhang, H. Zhang, J. Li, M. Zhou and Y. Wang, *Appl. Catal., B*, 2020, **264**, 118477.
25. N. Cao, Z. Chen, K. Zang, J. Xu, J. Zhong, J. Luo, X. Xu and G. Zheng, *Nat. Commun.*, 2019, **10**, 2877.
26. C. Lv, C. Yan, G. Chen, Y. Ding, J. Sun, Y. Zhou and G. Yu, *Angew. Chem. Int. Ed.*, 2018, **57**, 6073-6076.
27. P. Li, Z. Jin, Z. Fang and G. Yu, *Angew. Chem. Int. Ed.*, 2020, **59**, 22610-22616.
28. J. Li, G. Zhan, J. Yang, F. Quan, C. Mao, Y. Liu, B. Wang, F. Lei, L. Li, A. W. M. Chan, L. Xu, Y. Shi, Y.

- Du, W. Hao, P. K. Wong, J. Wang, S.-X. Dou, L. Zhang and J. C. Yu, *J. Am. Chem. Soc.*, 2020, **142**, 7036-7046.
29. Y. Wang, A. Xu, Z. Wang, L. Huang, J. Li, F. Li, J. Wicks, M. Luo, D.-H. Nam, C.-S. Tan, Y. Ding, J. Wu, Y. Lum, C.-T. Dinh, D. Sinton, G. Zheng and E. H. Sargent, *J. Am. Chem. Soc.*, 2020, **142**, 5702-5708.
30. Y. Wang, W. Zhou, R. Jia, Y. Yu and B. Zhang, *Angew. Chem. Int. Ed.*, 2020, **59**, 5350-5354.
31. G.-F. Chen, Y. Yuan, H. Jiang, S.-Y. Ren, L.-X. Ding, L. Ma, T. Wu, J. Lu and H. Wang, *Nat. Energy*, 2020, **5**, 605-613.
32. J. Choi, H.-L. Du, C. K. Nguyen, B. H. R. Suryanto, A. N. Simonov and D. R. MacFarlane, *ACS Energy Lett.*, 2020, **5**, 2095-2097.
33. R. Jia, Y. Wang, C. Wang, Y. Ling, Y. Yu and B. Zhang, *ACS Catal.*, 2020, **10**, 3533-3540.
